# Supplementary material
Source: MDPI journal article supplement (https://www.mdpi.com/1424-2818/13/12/628)
Supplement: s1 [file s1 › diversity-1477023-supplementary.pdf]

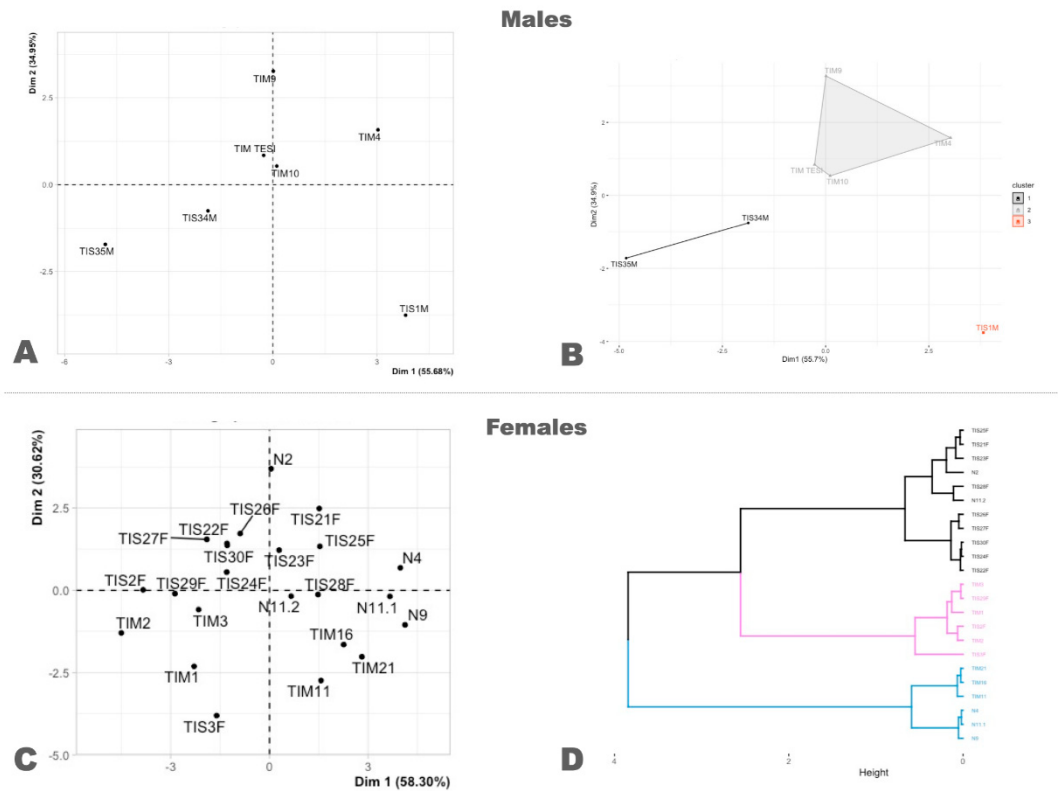

**Figure S1.** PCA and HCPC graphics for males (A–B) and females (C–D) morphological traits of *Trichuris* sp. collected from *Hystrix cristata* in the present study (TIS and TIM).
